# Supplementary material
Source: publisher figshare collection journal article supplement (https://gsajournals.figshare.com/ndownloader/files/29412513)
Supplement: Supplementary file 1 [file 29412513]

## Sheet: Sheet1
Table S1. Genes underrepresented by the Poly(A) isolation method:
	Gene	Chromosome	Gene type
	CNAG_12056	1	ncRNA
	CNAG_12087	1	ncRNA
	CNAG_12094	1	ncRNA
	CNAG_12216	3	ncRNA
	CNAG_12223	3	ncRNA
	CNAG_12256	3	ncRNA
	CNAG_12260	3	ncRNA
	CNAG_12265	3	ncRNA
	CNAG_12266	3	ncRNA
	CNAG_12434	5	ncRNA
	CNAG_12486	5	ncRNA
	CNAG_12573	6	ncRNA
	CNAG_12640	7	ncRNA
	CNAG_12667	7	ncRNA
	CNAG_12677	7	ncRNA
	CNAG_12692	7	ncRNA
	CNAG_12714	7	ncRNA
	CNAG_12894	10	ncRNA
	CNAG_12895	10	ncRNA
	CNAG_12987	11	ncRNA
	CNAG_12993	11	ncRNA
	CNAG_13128	13	ncRNA
	CNAG_13174	14	ncRNA
	CNAG_13196	14	ncRNA
	CNAG_00311	1	protein_coding
	CNAG_03835	2	protein_coding
	CNAG_07813	4	protein_coding
	CNAG_01093	5	protein_coding
	CNAG_05651	14	protein_coding
	CNAG_09000	Mt	protein_coding
	CNAG_09001	Mt	protein_coding
	CNAG_09002	Mt	protein_coding
	CNAG_09003	Mt	protein_coding
	CNAG_09004	Mt	protein_coding
	CNAG_09005	Mt	protein_coding
	CNAG_09006	Mt	protein_coding
	CNAG_09008	Mt	protein_coding
	CNAG_09009	Mt	protein_coding
	CNAG_09010	Mt	protein_coding
	CNAG_09011	Mt	protein_coding
	CNAG_09012	Mt	protein_coding
Table details the genes that are substantially underrepresented in the Poly(A)-treated libraries. The gene name, chromosome, and gene type are included for each gene.
